# Supplementary material for: Burden of severe illness associated with laboratory confirmed influenza in adults aged 50–64 years: A rapid review
Source: PubMed Central journal article supplement (PMC9178069; doi:10.1111/irv.12955), 2022-01-19
Supplement: IRV-16-632-s001.pdf [file IRV-16-632-s001.pdf]

## Supplementary information

### Kim *et al.* Burden of influenza in 50-64 year olds

---

|                                                                                                                                                               |    |
|---------------------------------------------------------------------------------------------------------------------------------------------------------------|----|
| <b>1. PRISMA checklist</b> .....                                                                                                                              | 2  |
| <b>2. Supplementary Tables &amp; Figures</b>                                                                                                                  |    |
| 2.1 Table S1. Details of the included articles on burden of influenza in adults aged 50-64 or 45-64 years.....                                                | 4  |
| 2.2 Table S2. Risk of Bias In Non-randomized Studies of Intervention assessment for included studies.....                                                     | 6  |
| 2.3 Figure S1. Median box plot of the ratio of hospitalization rate between 50-64 or 45-64 year olds to $\geq 65$ year olds across different study types..... | 7  |
| <b>3. Variables Extracted from Reviewed Articles</b> .....                                                                                                    | 8  |
| <b>4. Search Strategy</b> .....                                                                                                                               | 11 |

| Section 1: PRISMA CHECKLIST   |        |                                                                                                                                                                                                                                                                                                      |                                              |
|-------------------------------|--------|------------------------------------------------------------------------------------------------------------------------------------------------------------------------------------------------------------------------------------------------------------------------------------------------------|----------------------------------------------|
| Section and Topic             | Item # | Checklist item                                                                                                                                                                                                                                                                                       | Location where item is reported              |
| <b>TITLE</b>                  |        |                                                                                                                                                                                                                                                                                                      |                                              |
| Title                         | 1      | Identify the report as a systematic review.                                                                                                                                                                                                                                                          | Title p1 of manuscript; rapid not systematic |
| <b>ABSTRACT</b>               |        |                                                                                                                                                                                                                                                                                                      |                                              |
| Abstract                      | 2      | See the PRISMA 2020 for Abstracts checklist.                                                                                                                                                                                                                                                         |                                              |
| <b>INTRODUCTION</b>           |        |                                                                                                                                                                                                                                                                                                      |                                              |
| Rationale                     | 3      | Describe the rationale for the review in the context of existing knowledge.                                                                                                                                                                                                                          | p1-2 of manuscript                           |
| Objectives                    | 4      | Provide an explicit statement of the objective(s) or question(s) the review addresses.                                                                                                                                                                                                               | p2                                           |
| <b>METHODS</b>                |        |                                                                                                                                                                                                                                                                                                      |                                              |
| Eligibility criteria          | 5      | Specify the inclusion and exclusion criteria for the review and how studies were grouped for the syntheses.                                                                                                                                                                                          | p2                                           |
| Information sources           | 6      | Specify all databases, registers, websites, organisations, reference lists and other sources searched or consulted to identify studies. Specify the date when each source was last searched or consulted.                                                                                            | p2                                           |
| Search strategy               | 7      | Present the full search strategies for all databases, registers and websites, including any filters and limits used.                                                                                                                                                                                 | p2, Supporting Information                   |
| Selection process             | 8      | Specify the methods used to decide whether a study met the inclusion criteria of the review, including how many reviewers screened each record and each report retrieved, whether they worked independently, and if applicable, details of automation tools used in the process.                     | p2-3                                         |
| Data collection process       | 9      | Specify the methods used to collect data from reports, including how many reviewers collected data from each report, whether they worked independently, any processes for obtaining or confirming data from study investigators, and if applicable, details of automation tools used in the process. | p3                                           |
| Data items                    | 10a    | List and define all outcomes for which data were sought. Specify whether all results that were compatible with each outcome domain in each study were sought (e.g. for all measures, time points, analyses), and if not, the methods used to decide which results to collect.                        | Supporting Information                       |
|                               | 10b    | List and define all other variables for which data were sought (e.g. participant and intervention characteristics, funding sources). Describe any assumptions made about any missing or unclear information.                                                                                         | Supporting Information                       |
| Study risk of bias assessment | 11     | Specify the methods used to assess risk of bias in the included studies, including details of the tool(s) used, how many reviewers assessed each study and whether they worked independently, and if applicable, details of automation tools used in the process.                                    | p3, Supplementary Table 2                    |
| Effect measures               | 12     | Specify for each outcome the effect measure(s) (e.g. risk ratio, mean difference) used in the synthesis or presentation of results.                                                                                                                                                                  | p3                                           |
| Synthesis methods             | 13a    | Describe the processes used to decide which studies were eligible for each synthesis (e.g. tabulating the study intervention characteristics and comparing against the planned groups for each synthesis (item #5)).                                                                                 | Supplementary Table 1                        |
|                               | 13b    | Describe any methods required to prepare the data for presentation or synthesis, such as handling of missing summary statistics, or data conversions.                                                                                                                                                | N/A                                          |
|                               | 13c    | Describe any methods used to tabulate or visually display results of individual studies and syntheses.                                                                                                                                                                                               | N/A                                          |
|                               | 13d    | Describe any methods used to synthesize results and provide a rationale for the choice(s). If meta-analysis was performed, describe the model(s), method(s) to identify the presence and extent of statistical heterogeneity, and software package(s) used.                                          | N/A                                          |
|                               | 13e    | Describe any methods used to explore possible causes of heterogeneity among study results (e.g. subgroup analysis, meta-regression).                                                                                                                                                                 | p10                                          |
|                               | 13f    | Describe any sensitivity analyses conducted to assess robustness of the synthesized results.                                                                                                                                                                                                         | N/A                                          |

|                                                |     |                                                                                                                                                                                                                                                                                      |                                                    |
|------------------------------------------------|-----|--------------------------------------------------------------------------------------------------------------------------------------------------------------------------------------------------------------------------------------------------------------------------------------|----------------------------------------------------|
| Reporting bias assessment                      | 14  | Describe any methods used to assess risk of bias due to missing results in a synthesis (arising from reporting biases).                                                                                                                                                              | p3, Supplementary Table 1                          |
| Certainty assessment                           | 15  | Describe any methods used to assess certainty (or confidence) in the body of evidence for an outcome.                                                                                                                                                                                | N/A                                                |
| <b>RESULTS</b>                                 |     |                                                                                                                                                                                                                                                                                      |                                                    |
| Study selection                                | 16a | Describe the results of the search and selection process, from the number of records identified in the search to the number of studies included in the review, ideally using a flow diagram.                                                                                         | Figure 1, p4                                       |
|                                                | 16b | Cite studies that might appear to meet the inclusion criteria, but which were excluded, and explain why they were excluded.                                                                                                                                                          | p4                                                 |
| Study characteristics                          | 17  | Cite each included study and present its characteristics.                                                                                                                                                                                                                            | p4&7, Suppl Table 1                                |
| Risk of bias in studies                        | 18  | Present assessments of risk of bias for each included study.                                                                                                                                                                                                                         | Suppl Table 2                                      |
| Results of individual studies                  | 19  | For all outcomes, present, for each study: (a) summary statistics for each group (where appropriate) and (b) an effect estimate and its precision (e.g. confidence/credible interval), ideally using structured tables or plots.                                                     | Table 1, 2, 3, Figure 2a, 2b                       |
| Results of syntheses                           | 20a | For each synthesis, briefly summarise the characteristics and risk of bias among contributing studies.                                                                                                                                                                               | N/A                                                |
|                                                | 20b | Present results of all statistical syntheses conducted. If meta-analysis was done, present for each the summary estimate and its precision (e.g. confidence/credible interval) and measures of statistical heterogeneity. If comparing groups, describe the direction of the effect. | N/A                                                |
|                                                | 20c | Present results of all investigations of possible causes of heterogeneity among study results.                                                                                                                                                                                       | p10                                                |
|                                                | 20d | Present results of all sensitivity analyses conducted to assess the robustness of the synthesized results.                                                                                                                                                                           | N/A                                                |
| Reporting biases                               | 21  | Present assessments of risk of bias due to missing results (arising from reporting biases) for each synthesis assessed.                                                                                                                                                              | N/A                                                |
| Certainty of evidence                          | 22  | Present assessments of certainty (or confidence) in the body of evidence for each outcome assessed.                                                                                                                                                                                  | N/A                                                |
| <b>DISCUSSION</b>                              |     |                                                                                                                                                                                                                                                                                      |                                                    |
| Discussion                                     | 23a | Provide a general interpretation of the results in the context of other evidence.                                                                                                                                                                                                    | p13-14                                             |
|                                                | 23b | Discuss any limitations of the evidence included in the review.                                                                                                                                                                                                                      | p14                                                |
|                                                | 23c | Discuss any limitations of the review processes used.                                                                                                                                                                                                                                | p14                                                |
|                                                | 23d | Discuss implications of the results for practice, policy, and future research.                                                                                                                                                                                                       | p14                                                |
| <b>OTHER INFORMATION</b>                       |     |                                                                                                                                                                                                                                                                                      |                                                    |
| Registration and protocol                      | 24a | Provide registration information for the review, including register name and registration number, or state that the review was not registered.                                                                                                                                       | Not registered                                     |
|                                                | 24b | Indicate where the review protocol can be accessed, or state that a protocol was not prepared.                                                                                                                                                                                       | Not available due to COVID-19                      |
|                                                | 24c | Describe and explain any amendments to information provided at registration or in the protocol.                                                                                                                                                                                      | N/A                                                |
| Support                                        | 25  | Describe sources of financial or non-financial support for the review, and the role of the funders or sponsors in the review.                                                                                                                                                        | p1                                                 |
| Competing interests                            | 26  | Declare any competing interests of review authors.                                                                                                                                                                                                                                   | N/A                                                |
| Availability of data, code and other materials | 27  | Report which of the following are publicly available and where they can be found: template data collection forms; data extracted from included studies; data used for all analyses; analytic code; any other materials used in the review.                                           | Data variables collected in supporting information |

### Section 3: Supplementary Tables and Figures

**Table S1:** Details of included articles on burden of influenza in adults aged 50-64 or 45-64 years

| First author, year of publication                      | Country (Data source)                     | Season(s)          | Population                      | Included admission diagnoses                            | Outcome measures collected             |
|--------------------------------------------------------|-------------------------------------------|--------------------|---------------------------------|---------------------------------------------------------|----------------------------------------|
| <b>Population-based surveillance</b>                   |                                           |                    |                                 |                                                         |                                        |
| CDC, 2020 <sup>25</sup> and Tokars, 2018 <sup>26</sup> | United States, (FluSurv-NET) <sup>†</sup> | 2010-11 to 2019-20 | 50-64 years                     | Any                                                     | Hospitalization rate                   |
| Hughes, 2019 <sup>27</sup>                             | United States, Utah                       | 2016-17 to 2017-18 | 50-64 years                     | Any                                                     | Hospitalization rate                   |
| Ieng, 2018 <sup>28</sup>                               | Cambodia                                  | 2015-16            | 50-64 years                     | Not described                                           | Hospitalization rate                   |
| Yu, 2014 <sup>29</sup>                                 | China                                     | 2010-12            | 50-64 years                     | ICD-10                                                  | Hospitalization rate                   |
| PHAC, 2020 <sup>30</sup>                               | Canada (FluWatch)                         | 2014-15            | 45-64 years                     | Symptoms compatible with influenza                      | Hospitalization and case fatality rate |
| Arriola, 2017 <sup>31</sup>                            | United States, (FluSurv-NET) <sup>†</sup> | 2013-14            | 50-64 years, community dwelling | Any                                                     | Case fatality rate                     |
| Collins, 2020 <sup>32</sup>                            | United States, (FluSurv-NET) <sup>†</sup> | 2011-12 to 2014-15 | 50-64 years                     | Any                                                     | Case fatality rate                     |
| Torner, 2018 <sup>33</sup>                             | Spain, Catalonia                          | 2010-11 to 2014-15 | 45-64 years                     | Severe cases <sup>‡</sup>                               | Case fatality rate                     |
| <b>Ecologic studies</b>                                |                                           |                    |                                 |                                                         |                                        |
| Goldstein, 2015 <sup>34</sup>                          | United States, New York City              | 2010-11            | 50-64 years                     | Any                                                     | Hospitalization rate                   |
| Ng, 2019 <sup>35</sup>                                 | Singapore                                 | 2012-2017          | 50-64 years                     | Pneumonia and influenza (ICD-9 480-487, ICD-10 J10-J18) | Hospitalization rate                   |
| Rodrigues, 2018 <sup>36</sup>                          | Portugal                                  | 2010-11 to 2014-15 | 50-64 years                     | Pneumonia and influenza (ICD-9 480-487, ICD-10 J10-J18) | Hospitalization rate                   |

|                                |            |           |             |                                                         |                                    |
|--------------------------------|------------|-----------|-------------|---------------------------------------------------------|------------------------------------|
| Ang, 2014 <sup>37</sup>        | Singapore  | 2010-2012 | 45-64 years | Pneumonia and Influenza (ICD-9 480-487, ICD-10 J10-J18) | Hospitalization rate               |
| <b>Surveillance of SARI</b>    |            |           |             |                                                         |                                    |
| Abdel-Hady, 2018 <sup>38</sup> | Oman       | 2012-2015 | 50-64 years | ICD-10 J09-J18                                          | Hospitalization and mortality rate |
| Dawa, 2018 <sup>39</sup>       | Kenya      | 2012-2014 | 50-64 years | All                                                     | Hospitalization rate               |
| Emukule, 2019 <sup>40</sup>    | Uganda     | 2013-2016 | 50-64 years | Pneumonia as diagnosed by attending clinician           | Hospitalization rate               |
| Refaey, 2016 <sup>41</sup>     | Egypt      | 2013      | 50-64 years | All                                                     | Hospitalization rate               |
| Nyamusore, 2018 <sup>42</sup>  | Rwanda     | 2012-2014 | 45-64 years | All                                                     | Hospitalization rate               |
| Rabarison, 2019 <sup>43</sup>  | Madagascar | 2011-2016 | 45-64 years | All                                                     | Hospitalization rate               |
| Theo, 2018 <sup>44</sup>       | Zambia     | 2011-2014 | 45-64 years | All                                                     | Hospitalization rate               |

Abbreviations: rt-PCR: reverse transcription-polymerase chain reaction; CDC: Centre for Disease Control and Prevention; SARI: severe acute respiratory illness; ICD-10: International Classification of Diseases Tenth Revision; NP: nasopharyngeal; PHAC: Public Health Agency of Canada

†The Influenza Hospitalization Surveillance Network (FluSurv-NET) represents about 9% of the US population, and includes selected counties in California, Colorado, Connecticut, Georgia, Maryland, Michigan, Minnesota, New Mexico, New York, Ohio, Oregon, Tennessee, and Utah, with additional counties in Idaho (2010-11), Iowa (2012-13, 2020-21), Oklahoma (2010-11) and Rhode Island (2010-13)

**Table S2.** Risk of Bias In Non-randomized Studies of Intervention assessment for included studies

| First authors, year of publication          | Confounding | Selection bias | Classification of intervention | Intended intervention | Missing data | Measurement of outcomes | Reported results | Overall  |
|---------------------------------------------|-------------|----------------|--------------------------------|-----------------------|--------------|-------------------------|------------------|----------|
| <b><i>Population-based surveillance</i></b> |             |                |                                |                       |              |                         |                  |          |
| CDC, 2020 <sup>25</sup>                     | Moderate    | Low            | NI                             | NI                    | Low          | Moderate                | Low              | Moderate |
| Tokars, 2018 <sup>26</sup>                  | Moderate    | Low            | NI                             | NI                    | Low          | Moderate                | Low              | Moderate |
| Hughes, 2019 <sup>27</sup>                  | Moderate    | Low            | NI                             | NI                    | Low          | Moderate                | Low              | Moderate |
| Ieng, 2018 <sup>28</sup>                    | Moderate    | Moderate       | NI                             | NI                    | Low          | Low                     | Low              | Moderate |
| Yu, 2014 <sup>29</sup>                      | Moderate    | Moderate       | NI                             | NI                    | Low          | Low                     | Low              | Moderate |
| PHAC, 2020 <sup>30</sup>                    | Moderate    | Low            | NI                             | NI                    | Low          | Moderate                | Low              | Moderate |
| Arriola, 2014 <sup>31</sup>                 | Moderate    | Low            | Low                            | NI                    | Moderate     | Moderate                | Low              | Moderate |
| Collins, 2020 <sup>32</sup>                 | Moderate    | Low            | NI                             | NI                    | Low          | Moderate                | Low              | Moderate |
| Torner, 2018 <sup>33</sup>                  | Moderate    | Moderate       | NI                             | NI                    | Low          | Low                     | Low              | Moderate |
| <b><i>Ecologic studies</i></b>              |             |                |                                |                       |              |                         |                  |          |
| Goldstein, 2015 <sup>34</sup>               | Moderate    | Low            | NI                             | NI                    | Low          | Moderate                | Low              | Moderate |
| Ng, 2019 <sup>35</sup>                      | Moderate    | Moderate       | NI                             | NI                    | Low          | Moderate                | Low              | Moderate |
| Rodrigues, 2018 <sup>36</sup>               | Moderate    | Moderate       | NI                             | NI                    | Low          | Moderate                | Low              | Moderate |
| Ang, 2014 <sup>37</sup>                     | Moderate    | Moderate       | NI                             | NI                    | Low          | Moderate                | Low              | Moderate |
| <b><i>SARI surveillance</i></b>             |             |                |                                |                       |              |                         |                  |          |
| Abdel-Hady, 2018 <sup>38</sup>              | Moderate    | Moderate       | NI                             | NI                    | Low          | Low                     | Low              | Moderate |
| Dawa, 2018 <sup>39</sup>                    | Moderate    | Moderate       | NI                             | NI                    | Low          | Low                     | Low              | Moderate |
| Emukule, 2019 <sup>40</sup>                 | Moderate    | Moderate       | NI                             | NI                    | Low          | Low                     | Low              | Moderate |
| Refaey, 2016 <sup>41</sup>                  | Moderate    | Moderate       | NI                             | NI                    | Low          | Low                     | Low              | Moderate |
| Nyamusore, 2018 <sup>42</sup>               | Moderate    | Moderate       | NI                             | NI                    | Low          | Low                     | Low              | Moderate |
| Rabarison, 2019 <sup>43</sup>               | Moderate    | Moderate       | NI                             | NI                    | Low          | Low                     | Low              | Moderate |
| Theo, 2018 <sup>44</sup>                    | Moderate    | Moderate       | NI                             | NI                    | Low          | Low                     | Low              | Moderate |

Abbreviations: NI: no information

**Figure S1.** Median box plot of the ratio of hospitalization rates comparing 50-64 (or 45-64) to  $\geq 65$  year olds, by study type

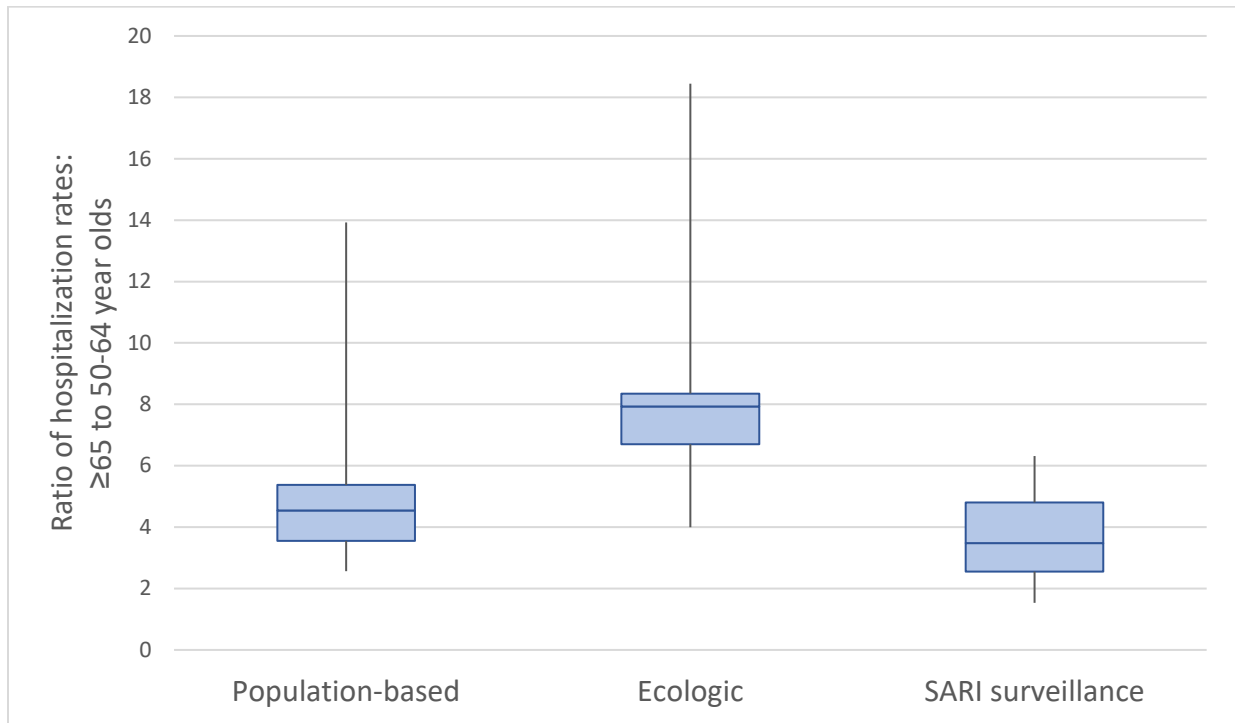

### Section 3: Variables Extracted from Reviewed Articles

#### *Study identifier*

- Author's name: full name of the first author; for governmental reports, we specified the name of the government institute that published the report.
- Published year: the year of publication of the article/report.
- Country: the country in which the surveillance was conducted.
- Season: the influenza season(s) for which the surveillance was conducted.
- Study design: research study method used to measure or estimate the outcomes.
- Age range: the age groups for which the outcomes were presented; we only included articles in which data were presented for adults aged 50-64 or 45-64 years.

#### *Outcome information*

- Diagnostic testing methods used: the list of tests used to confirm laboratory diagnosis of influenza infection.
- Definition of illness leading to testing: the list of indications, signs/symptoms, hospital admission diagnoses for which laboratory testing of influenza was conducted.
- Timing of swab/testing: the window of period during which specimens were collected from patients with compatible illness(es) leading to testing to confirm influenza infection.
- Diagnosis required for inclusion: the list of hospital admission/discharge diagnoses considered in the analysis
- Definition of catchment area: the area subjected to surveillance.
- Catchment population: the population of the catchment area (i.e., number of people at risk of influenza infection)
- Number of hospital admissions: the number of adults aged 50-64 or 45-64 years hospitalized with influenza.
- Number of deaths: the number of adults aged 50-64 or 45-64 years hospitalized with influenza.
- Crude hospitalization rate (per 100,000): the rate of hospitalization associated with influenza.
- Adjusted hospitalization rate (per 100,000): the rate of hospitalization associated with influenza, with study-specific adjustments.
- Crude mortality rate (per 100,000): the rate of mortality associated with influenza.
- Adjusted mortality rate (per 100,000): the rate of mortality associated with influenza, with study-specific adjustments.
- Variables used to adjust estimate: the list of variables for which the crude hospitalization and/or mortality rates were adjusted.
- Case fatality rate: the percentage of patients who died among those hospitalized with influenza.



## Section 4: Search Strategy

April 13 to 16, 2021

| Database                                                                             | Dates                     | Total       | Unique      | Duplicates  |
|--------------------------------------------------------------------------------------|---------------------------|-------------|-------------|-------------|
| Cochrane                                                                             | to issue 4 of 2021        | 368         | 128         | 240         |
| Embase Classic + Embase                                                              | 1980 to 2021 Week 14      | 3110        | 1668        | 1442        |
| MEDLINE(R)                                                                           | 1946 to March Week 5 2021 | 5304        | 5262        | 42          |
| Medline-in-Process                                                                   | 1946 to April 13, 2021    | 16          | 7           | 9           |
| Medline Epubs Ahead of Print                                                         | to April 13, 2021         | 16          | 9           | 7           |
| Hand searches                                                                        |                           |             |             |             |
| Scopus                                                                               | 2010 to April 14, 2021    | 334         | 205         | 129         |
| Web of Science (SCI-EXPANDED, SSCI, A&HCI, CPCI-S, CPCI-SSH, BKCI-S, BKCI-SSH, ESCI) | 2010 to April 14, 2021    | 247         | 77          | 170         |
| Grey literature                                                                      |                           |             |             |             |
| Microsoft Academic                                                                   | April 15, 2021            | 44          | 36          | 8           |
| OpenGrey                                                                             | April 15, 2021            | 6           | 6           | 0           |
| Science.gov                                                                          | April 15, 2021            | 101         | 36          | 65          |
| CDC                                                                                  | April 16, 2021            | 1           | 1           | 0           |
| CIC                                                                                  | April 16, 2021            | 3           | 3           | 0           |
| ECCMID                                                                               | April 16, 2021            | 15          | 14          | 1           |
| ECDPC                                                                                | April 16, 2021            | 3           | 3           | 0           |
| Google Scholar                                                                       | April 16, 2021            | 134         | 118         | 16          |
|                                                                                      |                           |             |             |             |
| <b>Total</b>                                                                         |                           | <b>9702</b> | <b>7573</b> | <b>2129</b> |

### MEDLINE

| # | Searches                                                                                                                                                                                                                                                                                                                                                                                                                                                             | Results | Comment         |
|---|----------------------------------------------------------------------------------------------------------------------------------------------------------------------------------------------------------------------------------------------------------------------------------------------------------------------------------------------------------------------------------------------------------------------------------------------------------------------|---------|-----------------|
| 1 | Influenza, Human/                                                                                                                                                                                                                                                                                                                                                                                                                                                    | 51178   |                 |
| 2 | influenzavirus a/ or influenza a virus/ or influenza a virus, h1n1 subtype/ or influenza a virus, h3n2 subtype/ or influenzavirus b/ or influenza b virus/                                                                                                                                                                                                                                                                                                           | 38870   |                 |
| 3 | (influenza* or flu).ti,ab,kf.                                                                                                                                                                                                                                                                                                                                                                                                                                        | 118045  |                 |
| 4 | Influenza Vaccines/                                                                                                                                                                                                                                                                                                                                                                                                                                                  | 23677   |                 |
| 5 | or/1-4                                                                                                                                                                                                                                                                                                                                                                                                                                                               | 125622  | Influenza terms |
| 6 | intubation/ or intubation, intratracheal/ or critical care/ or Hospitalization/ or "length of stay"/ or patient admission/ or patient discharge/ or patient handoff/ or patient readmission/ or patient transfer/ or inpatients/                                                                                                                                                                                                                                     | 358684  |                 |
| 7 | airway management/ or airway extubation/ or respiration, artificial/ or high-frequency ventilation/ or high-frequency jet ventilation/ or interactive ventilatory support/ or liquid ventilation/ or noninvasive ventilation/ or one-lung ventilation/ or positive-pressure respiration/ or continuous positive airway pressure/ or intermittent positive-pressure breathing/ or intermittent positive-pressure ventilation/ or ventilator weaning/ or tracheostomy/ | 90075   |                 |
| 8 | ventilators, mechanical/ or ventilators, negative-pressure/                                                                                                                                                                                                                                                                                                                                                                                                          | 9401    |                 |
| 9 | intensive care units/ or coronary care units/ or respiratory care units/                                                                                                                                                                                                                                                                                                                                                                                             | 62810   |                 |

|    |                                                                                                                                                                                                                                                                                                                            |         |                                              |
|----|----------------------------------------------------------------------------------------------------------------------------------------------------------------------------------------------------------------------------------------------------------------------------------------------------------------------------|---------|----------------------------------------------|
| 10 | (icu or icus or (intensive adj2 care*)).ti,ab,kf.                                                                                                                                                                                                                                                                          | 154069  |                                              |
| 11 | mo.fs.                                                                                                                                                                                                                                                                                                                     | 598976  |                                              |
| 12 | morbidity/ or incidence/ or prevalence/ or mortality/ or "cause of death"/ or fatal outcome/ or hospital mortality/ or mortality, premature/ or survival rate/                                                                                                                                                             | 904733  |                                              |
| 13 | (morbidity* or mortality* or death* or fatal* or survival*).ti,ab,kf.                                                                                                                                                                                                                                                      | 2157692 |                                              |
| 14 | Frailty/                                                                                                                                                                                                                                                                                                                   | 3812    |                                              |
| 15 | actuarial analysis/ or life tables/ or quality-adjusted life years/ or probability/ or odds ratio/ or proportional hazards models/ or risk/ or logistic models/ or protective factors/ or risk assessment/ or adverse outcome pathways/ or "healthcare failure mode and effect analysis"/ or risk factors/ or uncertainty/ | 1396943 |                                              |
| 16 | ((hospitalization or hospitalisation or inpatient* or "in-patient*") adj2 rate*).ti,ab,kf.                                                                                                                                                                                                                                 | 24225   |                                              |
| 17 | (hospitalized or hospitalised).ti,ab,kf.                                                                                                                                                                                                                                                                                   | 102919  |                                              |
| 18 | or/6-17]                                                                                                                                                                                                                                                                                                                   | 4052794 | Hospitalization or morbidity/mortality terms |
| 19 | 5 and 18                                                                                                                                                                                                                                                                                                                   | 30902   | Base clinical set                            |
| 20 | limit 19 to "middle age (45 to 64 years)"                                                                                                                                                                                                                                                                                  | 8091    |                                              |
| 21 | Middle Aged/ or ("middle-age*" or "middle age*" or "adults aged > 65 years" or "50-64 years").ti,ab,kf.                                                                                                                                                                                                                    | 4495400 |                                              |
| 22 | 20 or (19 and 21)                                                                                                                                                                                                                                                                                                          | 8157    | Age group limit                              |
| 23 | limit 22 to yr="2010 -Current"                                                                                                                                                                                                                                                                                             | 5304    | Final Results – publication date limit       |
